# Supplementary material for: Magnetic drop-in tungsten boat furnace vaporisation inductively coupled plasma atomic emission spectrometry (MDI-TBF-ICP-AES) for the direct solid sampling of iron and steel
Source: Royal Society of Chemistry journal article supplement (doi:10.1039/b803995j), 2008-01-01
Supplement: b803995j-1.pdf [file b803995j-1.pdf]

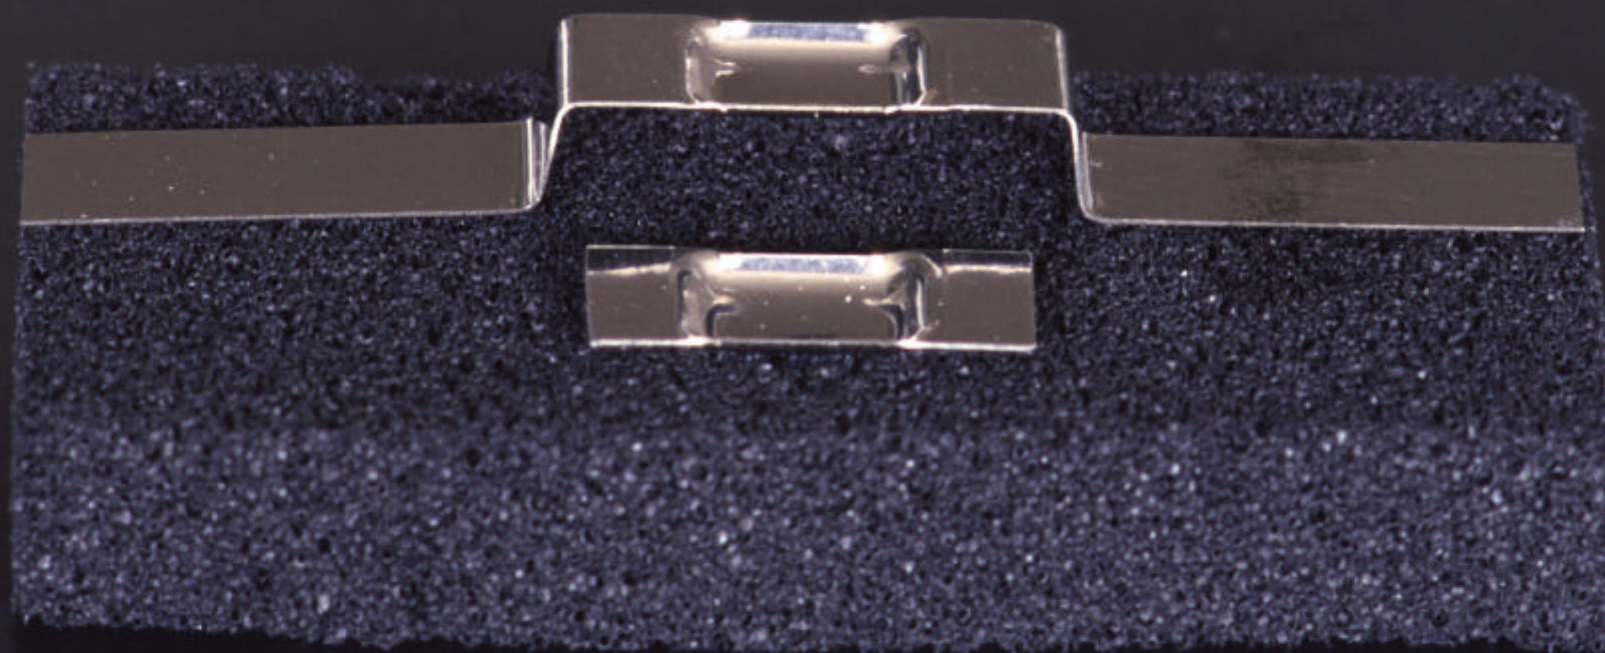

Fig. S1 Sample cuvette and tungsten boat furnace

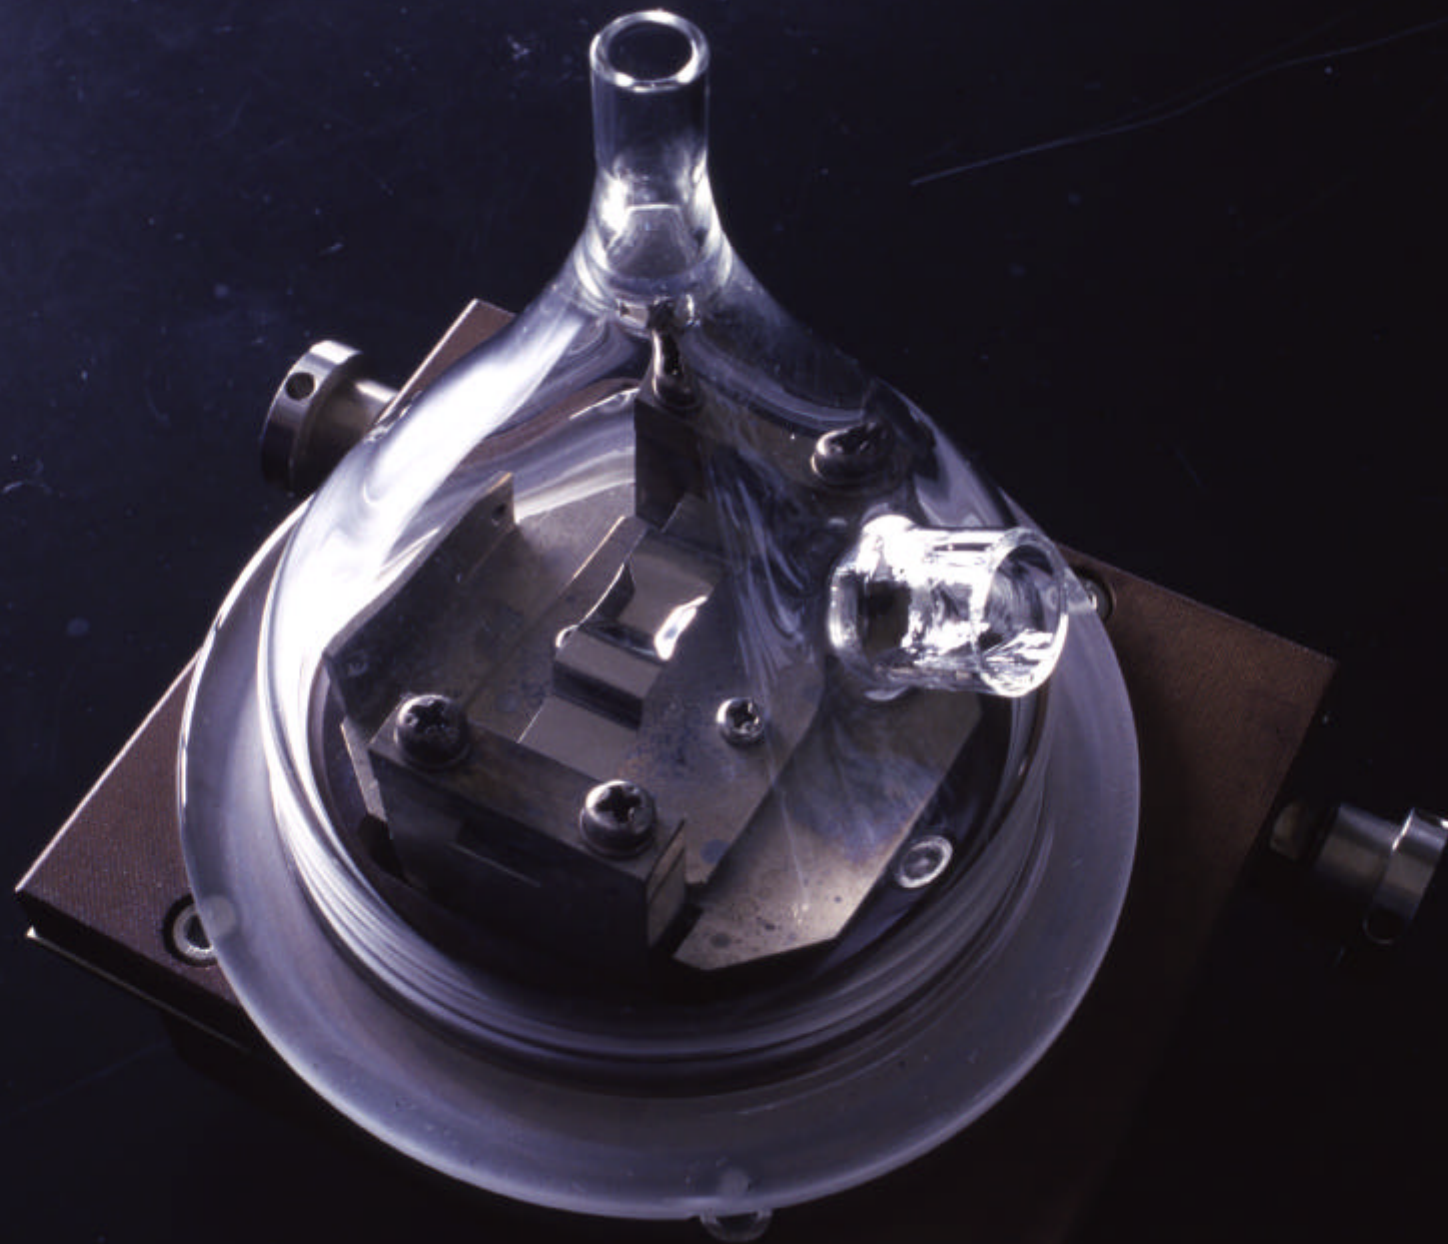

Fig. S2 Head of tungsten boat furnace vaporiser

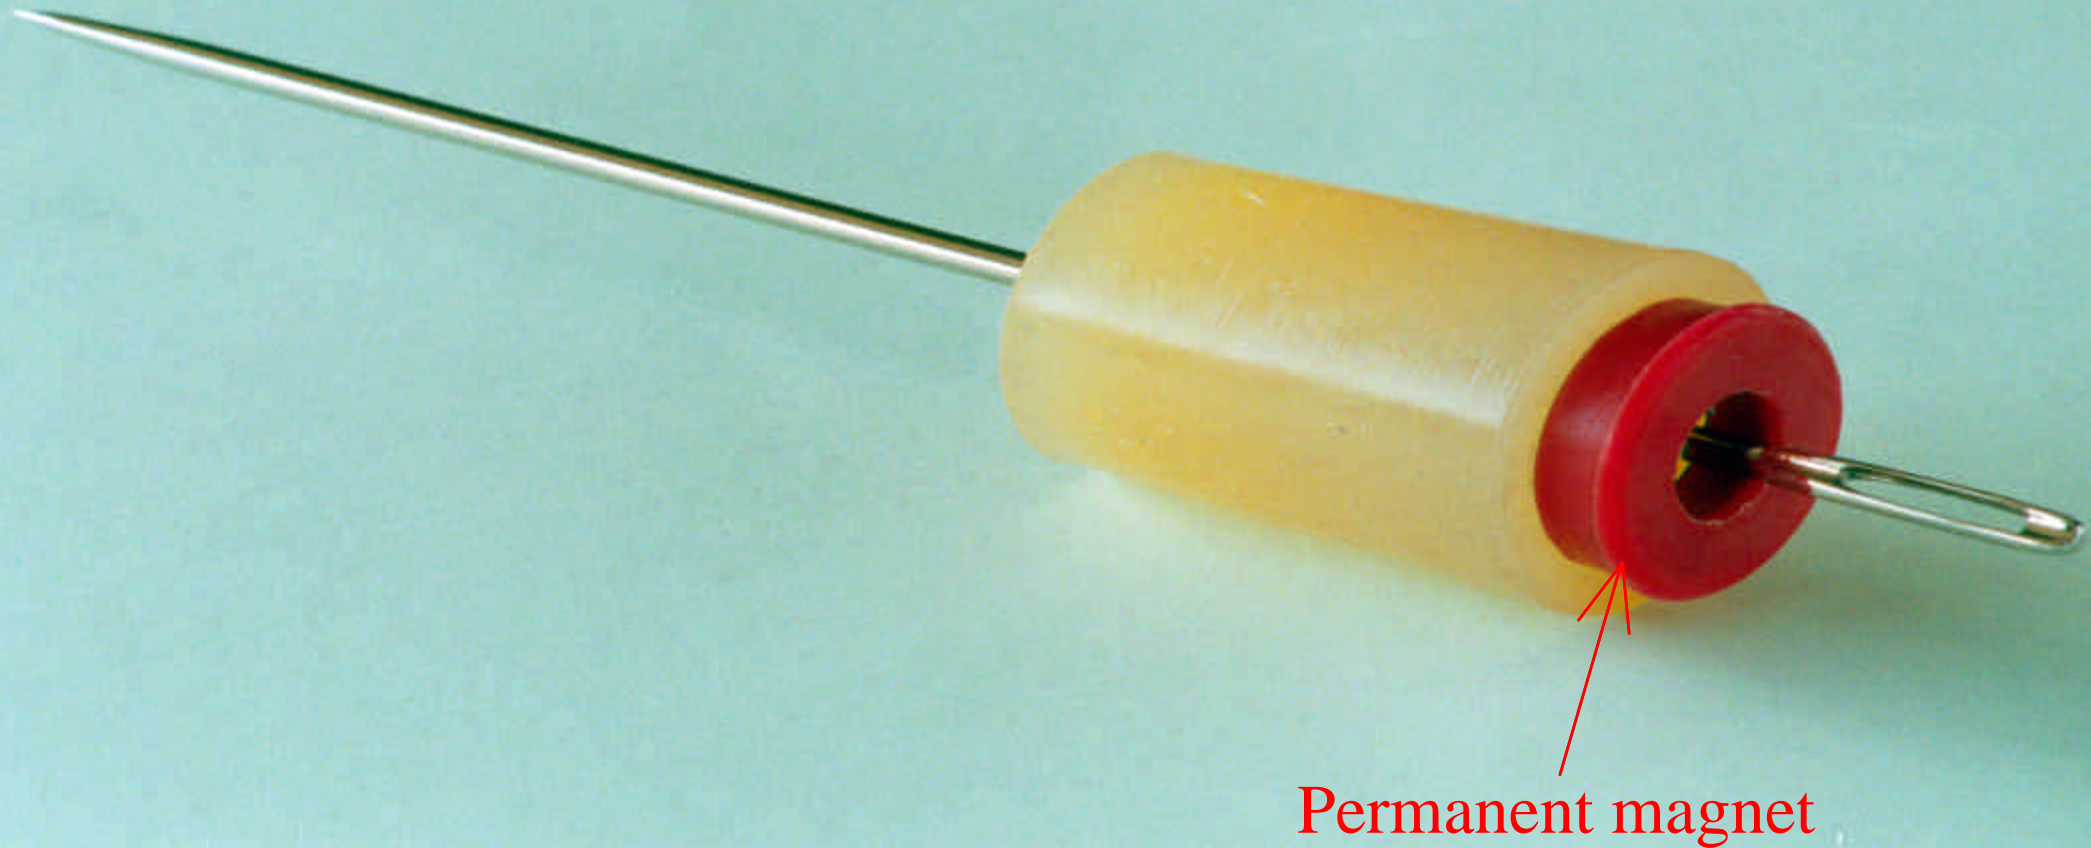

Fig. S3 Silicone rubber stopper through which needle pierced.

By attaching a permanent magnet to the outer edge of the needle (1.0 mm o.d. x 130 mm long, made of steel), the opposite edge allows to hang several pieces of iron/steel sample.
