# Supplementary material for: Magnetic drop-in tungsten boat furnace vaporisation inductively coupled plasma atomic emission spectrometry (MDI-TBF-ICP-AES) for the direct solid sampling of iron and steel
Source: Royal Society of Chemistry journal article supplement (doi:10.1039/b803995j), 2008-01-01
Supplement: b803995j-2.pdf [file b803995j-2.pdf]

## Table S1 Recommended operating conditions

---

### ICP atomic emission spectrometer (*SII SAS4000*)

|                     |                                       |
|---------------------|---------------------------------------|
| R.F. incident power | 1.6 kW                                |
| Argon plasma gas    | 15 dm <sup>3</sup> min <sup>-1</sup>  |
| Argon auxiliary gas | 1.5 dm <sup>3</sup> min <sup>-1</sup> |
| Analytical line     | S I 180.734 nm                        |
|                     | Se I 196.060 nm                       |
|                     | Sb I 217.581 nm                       |
| Observation height  | 8 mm above load coil                  |

### Tungsten boat furnace vaporizer (*SII SAS / 705V*)

|                                              |                                        |
|----------------------------------------------|----------------------------------------|
| Ashing                                       | 150 for 10 s (ramp 3 s)                |
| Vaporization                                 | 2300 for 20 s (ramp 5 s)               |
| Carrier gas<br>(15% H <sub>2</sub> + 85% Ar) | 1000 cm <sup>3</sup> min <sup>-1</sup> |

---
